# Supplementary material for: Brochosomes as an antireflective camouflage coating for leafhoppers
Source: eLife. 2025 May 28;13:RP99639. doi: 10.7554/eLife.99639 (PMC12119089; doi:10.7554/eLife.99639)
Supplement: Supplementary file 1. [file elife-99639-supp1.xlsx]

## Sheet: Sheet1
Table S1. List of oligonucleotide primers used in this study
Oligonucleotide	Assay	Sequence (5'-3')
CO1_F	PCR	TTGATTTTTTGGTCATCCAGAAGT
CO1_R	PCR	TCCAATGCACTAATCTGCCATATTA
qPCR_BSM1_F	qPCR	CTCCTTGACCGCTTCATC
qPCR_BSM1_R	qPCR	CGCCATCCTGTTCTTCAT
qPCR_BSM2_F	qPCR	CAGTTCCCTTGCTTCATTT
qPCR_BSM2_R	qPCR	CCACCAGGATGTTCAGAG
qPCR_BSM3_F	qPCR	GATGACCAGTTCACCTAC
qPCR_BSM3_R	qPCR	GTCCGTAACAATGTCTGA
qPCR_BSM4_F	qPCR	ACTGGTGGACAACATGAA
qPCR_BSM4_R	qPCR	AAGTAGAGATGCCGTTGAT
qPCR_EF1_F	qPCR	CAGTGAGAGCCGTTTTGAG
qPCR_EF1_R	qPCR	AGGGCATCTTGTCAGAGGGC
T7_BSM1_ region1_F	RNAi	GGATCCTAATACGACTCACTATAGGCTCCTTGACCGCTTCATC
T7_BSM1_ region1_R	RNAi	GGATCCTAATACGACTCACTATAGGGTCACTATCTCCAAGGTT
T7_BSM2_ region1_F	RNAi	GGATCCTAATACGACTCACTATAGGCGACTTTGACATATCTGAG
T7_BSM2_ region1_R	RNAi	GGATCCTAATACGACTCACTATAGGCCACCAGGATGTTCAGAG
T7_BSM3_ region1_F	RNAi	GGATCCTAATACGACTCACTATAGGATGCTTATCGGCCTCTTTCTTTTG
T7_BSM3_ region1_R	RNAi	GGATCCTAATACGACTCACTATAGGCTGCTCTGAAGATTCCAA
T7_BSM4_ region1_F	RNAi	GGATCCTAATACGACTCACTATAGGGTCACTGGTGGACAACAT
T7_BSM4_ region1_R	RNAi	GGATCCTAATACGACTCACTATAGGTTGTAGAAGGCGTGTAAGT
T7_BSM1_region2_F	RNAi	GGATCCTAATACGACTCACTATAGGTGTTCTCGCTGTTTTCACCG
T7_BSM1_region2_R	RNAi	GGATCCTAATACGACTCACTATAGGTTAGACGATCCAACCATGCG
T7_BSM2_region2_F	RNAi	GGATCCTAATACGACTCACTATAGGGAAAGGGGTGTTGTTGGTGG
T7_BSM2_region2_R	RNAi	GGATCCTAATACGACTCACTATAGGCAGCTGAAAGGACCGCAG
T7_BSM3_region2_F	RNAi	GGATCCTAATACGACTCACTATAGGGCTGTGGATGTCATTGGTCC
T7_BSM3_region2_R	RNAi	GGATCCTAATACGACTCACTATAGGCAGGGACGAAGATCTCCTCG
T7_BSM4_region2_F	RNAi	GGATCCTAATACGACTCACTATAGGTCGAGCGGAGATAAATGTGAA
T7_BSM4_region2_R	RNAi	GGATCCTAATACGACTCACTATAGGCTGTCTCCGATGCCTTCTGT
T7_GFP_F	RNAi	GGATCCTAATACGACTCACTATAGGCACAAGTTCAGCGTGTCCG
T7_GFP_R	RNAi	GGATCCTAATACGACTCACTATAGGGTTCACCTTGATGCCGTTC
RACE_BSM1_F1	RACE	GATTACGCCAAGCTTCCTTGACCGCTTCATCGCCCTCATACCC
RACE_BSM1_R1	RACE	GATTACGCCAAGCTTGCCTTCGTCACTGCCGCTGTCACCTTC
RACE_BSM1_F2	RACE	GATTACGCCAAGCTTCTGAGTGCGTATATCAAGGGCGTAGT
RACE_BSM1_R2	RACE	GATTACGCCAAGCTTCTGTCACCTTCCTCTTCGGATGTAGTC
RACE_BSM2_F1	RACE	GATTACGCCAAGCTTTGGTGGCGTTGGTGTTCACTGTCGGCTT
RACE_BSM2_R1	RACE	GATTACGCCAAGCTTGAGCATCCTCTAGCGGGCGTGCAGCAG
RACE_BSM2_F2	RACE	GATTACGCCAAGCTTGCCAAGTACGGATTCTCCTCTCTGT
RACE_BSM2_R2	RACE	GATTACGCCAAGCTTCTGAAAGGACCGCAGCCGTTGTTG
RACE_BSM3_F1	RACE	GATTACGCCAAGCTTGCTGGCGGCTTGAACATCATCGGCATG
RACE_BSM3_R1	RACE	GATTACGCCAAGCTTCGTAGGTGAACTGGTCATCCGGCAGAGG
RACE_BSM3_F2	RACE	GATTACGCCAAGCTTACGAAGAGGAAGACGATGGCGAGGAT
RACE_BSM3_R2	RACE	GATTACGCCAAGCTTCGGCAGAGGGAAGAAGGTATAGCAGATG
RACE_BSM4_F1	RACE	GATTACGCCAAGCTTCATCGACACCTGTGCCCGCACCTACCC
RACE_BSM4_R1	RACE	GATTACGCCAAGCTTGACACGACTCCATTCGCCGCCGTCTGG
RACE_BSM4_F2	RACE	GATTACGCCAAGCTTGGAATCGTTTGAGGACATGCGTTG
RACE_BSM4_R2	RACE	GATTACGCCAAGCTTCTCCCCACAGTGCTTGCTACCAC
