# Supplementary material for: Brochosomes as an antireflective camouflage coating for leafhoppers
Source: eLife. 2025 May 28;13:RP99639. doi: 10.7554/eLife.99639 (PMC12119089; doi:10.7554/eLife.99639)
Supplement: Supplementary file 2. [file elife-99639-supp2.xlsx]

## Sheet: Sheet1
Table S2. Information on hemipteran insects used in the search for homologs of BSM
Suborder	Family	Organism	BioProject
Coleorrhyncha	Peloridiidae	Hackeriella veitchi	PRJNA357411
Sternorrhyncha	Aphrophoridae	Philaenus spumarius	PRJNA272277
	Aphrophoridae	Aphrophora alni	PRJNA272162
	Cercopidae	Prosapia bicincta	PRJNA272284
		Cercopis vulnerata	PRJNA183205
	Clastopteridae	Clastoptera obtusa	PRJNA295707
		Clastoptera arizonana	PRJNA303152
	Epipygidae	Epipyga sp.	PRJNA295739
	Machaerotidae	Pectinariophyes stalii	PRJNA295734
Auchenorrhyncha	Cicadidae	Maoricicada tenuis	PRJNA295717
		Kikihia scutellaris	PRJNA295715
		Guineapsaltria flava	PRJNA295700
		Tamasa doddi	PRJNA295701
		Megatibicen dorsatus	PRJNA272295
		Burbunga queenslandica	PRJNA295699
		Tettigades auropilosa	PRJNA295726
		Okanagana villosa	PRJNA183205
		Chilecicada sp.	PRJNA295722
	Peloridiidae	Xenophysella greensladeae	PRJNA183205
		Xenophyes metoponcus	PRJNA272209
		Peloridium pomponorum	PRJNA272276
	Tettigarctidae	Tettigarcta crinita	PRJNA295711
	Acanaloniidae	Acanalonia conica	PRJNA272210
	Achilidae	Catonia nava	PRJNA295706
	Caliscelidae	Caliscelis bonellii	PRJNA272168
		Bruchomorpha oculata	PRJNA272222
	Cixiidae	Tachycixius pilosus	PRJNA272206
		Melanoliarus placitus	PRJNA272269
	Delphacidae	Idiosystatus acutiusculus	PRJNA272251
		Nilaparvata lugens	PRJNA183205
	Derbidae	Omolicna uhleri	PRJNA295709
	Dictyopharidae	Yucanda albida	PRJNA357446
		Phylloscelis atra	PRJNA272279
		Dictyophara europaea	PRJNA272176
		Chondrodire chilensis	PRJNA272294
	Eurybrachidae	Platybrachys sp.	PRJNA295736
	Flatidae	Ormenoides venusta	PRJNA272272
		Metcalfa pruinosa	PRJNA272198
		Jamella australiae	PRJNA295743
		Geisha distinctissima	PRJNA352589
	Fulgoridae	Lycorma delicatula	PRJNA357415
		Pyrops candelaria	PRJNA352589
		Cyrpoptus belfragei	PRJNA272237
	Issidae	Gergithus sp.	PRJNA352589
		Thionia simplex	PRJNA295721
	Nogodinidae	Lipocallia australensis	PRJNA295732
		Bladina sp.	PRJNA357426
	Ricaniidae	Scolypopa sp.	PRJNA295737
		Ricania speculum	PRJNA357442
	Tettigometridae	Tettigometra bipunctata	PRJNA357421
	Tropiduchidae	Ladella sp.	PRJNA272255
	Aetalionidae	Lophyraspis sp.	PRJNA357414
		Aetalion reticulatum	PRJNA357422
	Cicadellidae	Agallia constricta	PRJNA272213
		Aphrodes bicincta	PRJNA357425
		Vidanoana flavomaculata	PRJNA272302
		Homalodisca vitripennis	PRJNA415461; PRJNA342859
		Homalodisca liturata	PRJNA303151
		Graphocephala fennahi	PRJNA272183
		Graphocephala coccinea	PRJNA341855
		Graphocephala atropunctata	PRJNA299492
		Cuerna arida	PRJNA303150
		Cicadella viridis	PRJNA629998
		Tinobregmus viridescens	PRJNA295727
		Scaphoideus titanus	PRJNA765507
		Recilia dorsalis	PRJNA629998
		Psammotettix striatus	PRJNA743281
		Penthimia sp.	PRJNA357438
		Nephotettix virescens	PRJNA671146
		Neoaliturus tenellus	PRJNA318850
		Macrosteles quadrilineatus	PRJNA562189; PRJNA438515;PRJNA318848
		Haldorus sp.	PRJNA357443
		Graminella nigrifrons	PRJNA167489
		Exitianus exitiosus	PRJNA562189
		Exitianus capicola	PRJNA807480
		Euscelidius variegatus	PRJNA393620
		Euacanthella palustris	PRJNA295730
		Dalbulus maidis	PRJNA505618; PRJNA318849; PRJNA631706; PRJNA272239
		Balclutha rubrostriata	PRJNA562189
		Balclutha neglecta	PRJNA562189
		Agudus sp. AgspCi3	PRJNA357423
		Macropsis decisa	PRJNA295724
		Idiocerus rotundens	PRJNA295723
		Ponana quadralaba	PRJNA272282
		Penestragania robusta	PRJNA357439
		Tituria crinita	PRJNA357436
		Stenocotis depressa	PRJNA295738
		Hespenedra chilensis	PRJNA272247
		Neocoelidia tumidifrons	PRJNA295725
		Nionia palmeri	PRJNA295720
		Zyginidia pullula	PRJNA171390
		Watara sudra	PRJNA718899
		Matsumurasca onukii	PRJNA347531
		Empoasca fabae	PRJNA272241
		Amrasca biguttula biguttula	PRJNA555157
		Ulopa reticulata	PRJNA272207
		Xestocephalus desertorum	PRJNA295729
	Melizoderidae	Llanquihuea pilosa	PRJNA272258
		Umbonia crassicornis	PRJNA295728
		Tolania sp.	PRJNA357445
		Stictocephala bisonia	PRJNA272293
		Procyrta sp.	PRJNA357441
		Notocera sp.	PRJNA357437
		Nessorhinus gibberulus	PRJNA272268
		Microcentrus caryae	PRJNA295719
		Membracis tectigera	PRJNA357433
		Lycoderes burmeisteri	PRJNA357432
		Holdgatiella chepuensis	PRJNA272249
		Heteronotus sp.	PRJNA295741
		Entylia carinata	PRJNA415461
		Enchenopa latipes	PRJNA272226
		Cyphonia clavata	PRJNA357428
		Chelyoidea sp.	PRJNA357427
		Centrotus cornutus	PRJNA272169
		Amastris sp.	PRJNA357424
		Mapuchea sp.	PRJNA272263
